# Supplementary figures and images for: Stress-dependent dilated cardiomyopathy in mice with cardiomyocyte-restricted inactivation of cyclic GMP-dependent protein kinase I
Source: PubMed Central journal article supplement — Eur Heart J. 2011 Dec 23;34(16):1233–44. doi: 10.1093/eurheartj/ehr445 (PMC3631523; doi:10.1093/eurheartj/ehr445), 2011-12-23

Suppl. Figure 1

□ Ctr  
■ CM cGKI KO

**A**

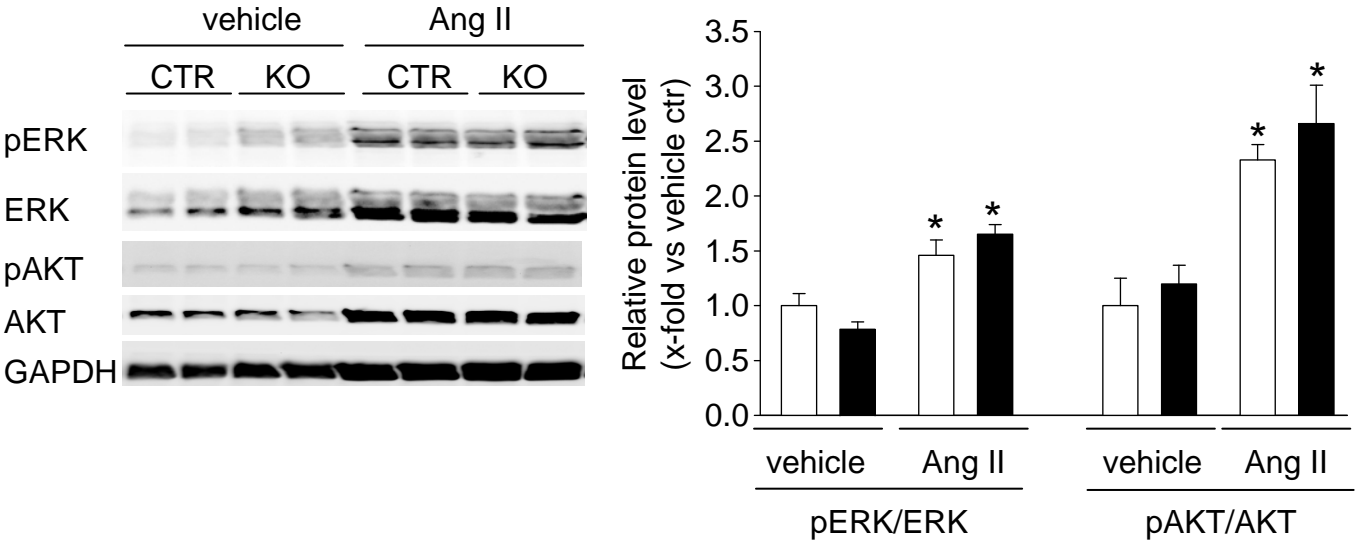

**B**

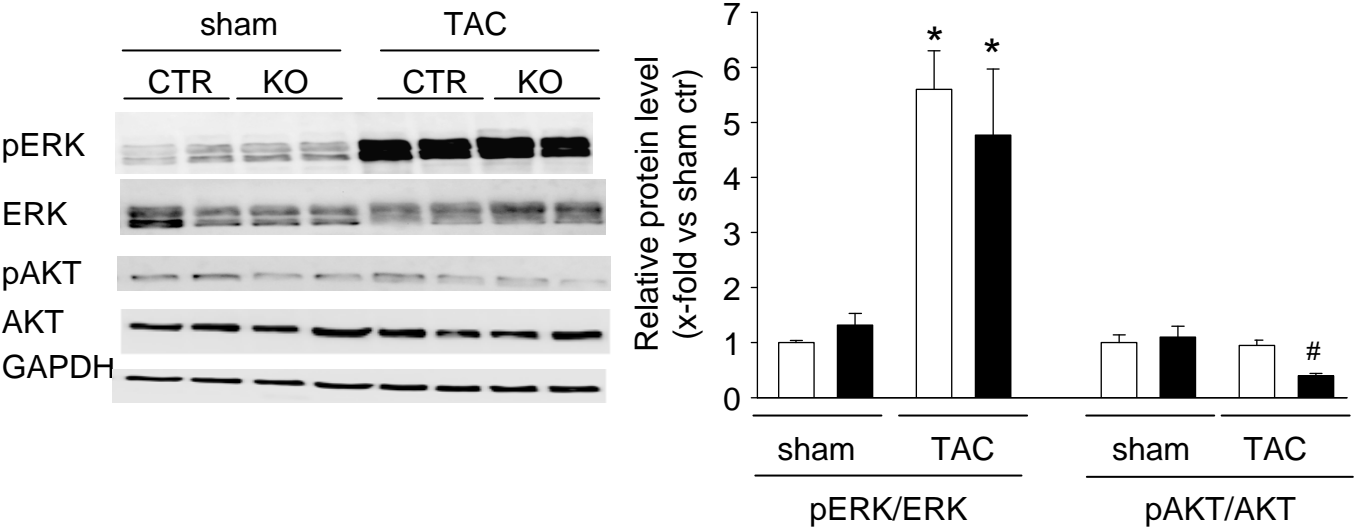

Supplement: supp_ehr445_ehr445supp_fig1.pdf [file supp_ehr445_ehr445supp_fig1.pdf]
